# Supplementary material for: Re-examining how complexin inhibits neurotransmitter release
Source: eLife journal article supplement (doi:10.7554/elife.02391), 2014-05-08
Supplement: supp [file elife_poa_e02391_Figure_1_figure_supplement_1.pdf › elife_poa_e02391_Figure_1_figure_supplement_1.pdf]

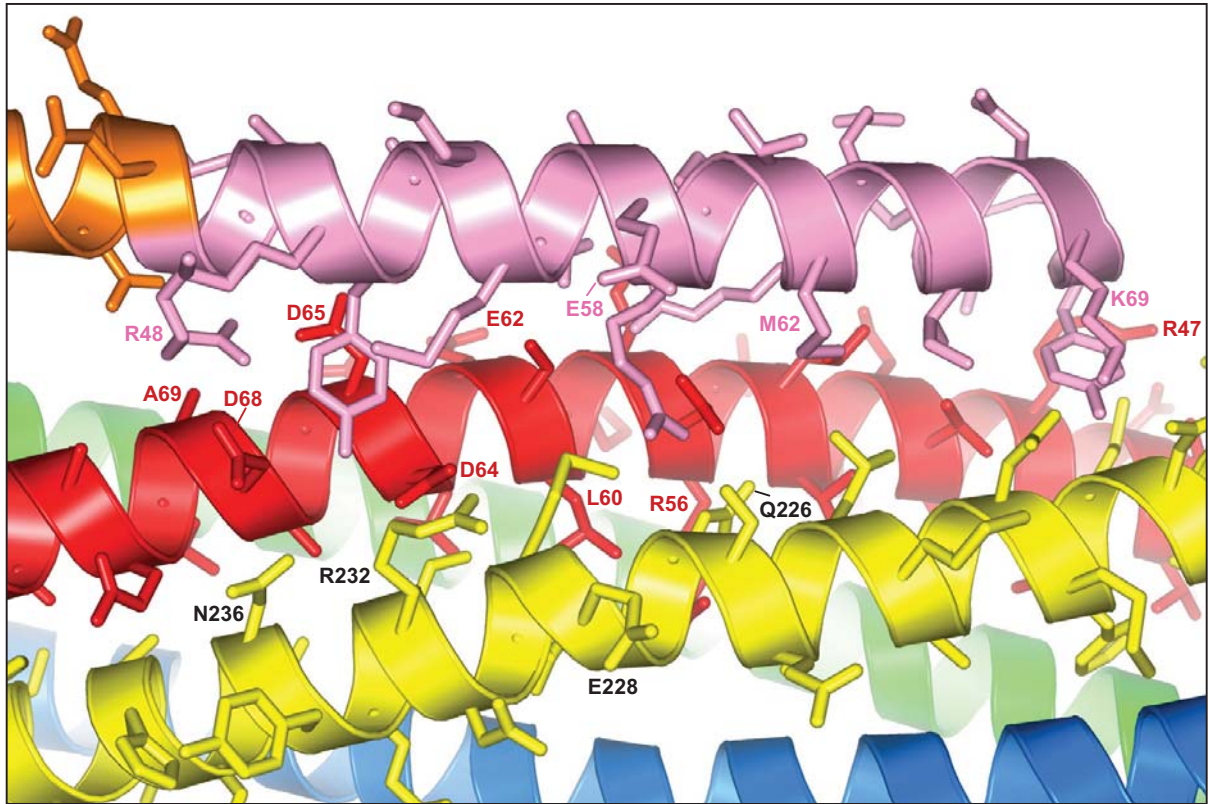

**Figure 1 – figure supplement 1. The interface between CpxI and the SNARE complex.** A ribbon diagram of the crystal structure of the CpxI(26-83)/SNARE complex(PDB code 1KIL) (Chen et al., 2002) is shown, with synaptobrevin colored in red, syntaxin-1 in yellow, SNAP-25 in blue and green (N-terminal and C-terminal SNARE motifs, respectively), and CpxI(26-83) in orange (accessory helix) and pink (central helix). The side chains of CpxI(26-83), synaptobrevin and syntaxin-1 are shown, and selected residues are labeled as a guide to see which residues interact and where were the truncations of the different proteins made.
