# Supplementary material for: Re-examining how complexin inhibits neurotransmitter release
Source: eLife journal article supplement (doi:10.7554/elife.02391), 2014-05-08
Supplement: supp [file elife_poa_e02391_Figure_2_figure_supplement_1.pdf › elife_poa_e02391_Figure_2_figure_supplement_1.pdf]

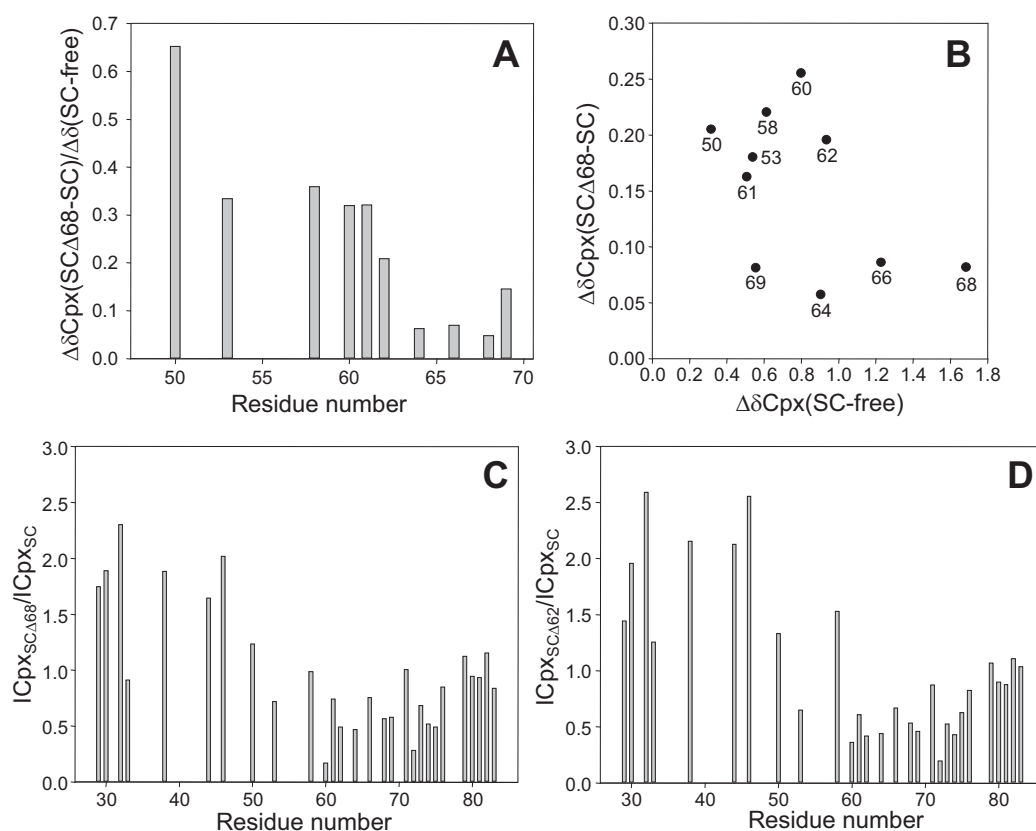

**Figure 2 – figure supplement 1. Additional analysis of the interaction between  $^2\text{H}$ ,  $^{15}\text{N}$ -labeled CpxI fragments and synaptobrevin-truncated SNARE complexes.**

**A.** Chemical shift changes in the CpxI central helix of SNARE complex-bound  $^2\text{H}$ ,  $^{15}\text{N}$ -CpxI(26-83) caused by truncation of synaptobrevin to residue 68, normalized by the changes caused by binding of  $^2\text{H}$ ,  $^{15}\text{N}$ -CpxI(26-83) to the SC. The chemical shift changes were calculated as  $\Delta\delta = [(\Delta\delta\text{HN})^2 + (0.17 \cdot \Delta\delta\text{N})^2]^{1/2}$ , where  $\Delta\delta\text{HN}$  and  $\Delta\delta\text{N}$  are the differences in HN and N chemical shifts, respectively, between the spectra being compared. For  $\Delta\delta\text{Cpx}(\text{SC}\Delta 68\text{-SC})$ , we compared  $^1\text{H}$ - $^{15}\text{N}$  TROSY-HSQC spectra of  $^2\text{H}$ ,  $^{15}\text{N}$ -CpxI(26-83) bound to SC and bound to SC $\Delta 68$ . For  $\Delta\delta\text{Cpx}(\text{SC-free})$ , we compared  $^1\text{H}$ - $^{15}\text{N}$  TROSY-HSQC spectra of  $^2\text{H}$ ,  $^{15}\text{N}$ -CpxI(26-83) free and bound to SC. **B.** Plot of  $\Delta\delta\text{Cpx}(\text{SC}\Delta 68\text{-SC})$  versus  $\Delta\delta\text{Cpx}(\text{SC-free})$ . **C,D.** Ratio between the intensities of cross-peaks of  $^1\text{H}$ - $^{15}\text{N}$  TROSY-HSQC spectra of  $^2\text{H}$ ,  $^{15}\text{N}$ -CpxI(26-83) bound to SC $\Delta 68$  (**C**) or SC $\Delta 62$  (**D**) vs those observed for  $^2\text{H}$ ,  $^{15}\text{N}$ -CpxI(26-83) bound to SC. To correct for small differences in protein concentrations, the cross-peaks intensities measured for each spectra were normalized with a correction factor derived by averaging the cross-peak intensities of the five C-terminal residues (residues 79-83), which were practically unaffected by the synaptobrevin C-terminal truncations. In all the plots shown in **A-D**, comparisons between chemical shifts or cross-peak intensities were made only for cross-peaks that could be identified in all the relevant spectra based on the assignments available for free and SNARE complex-bound Cpx(26-83) (Figures 2A,B) (Pabst et al., 2000; Chen et al., 2002) and the progressive movements caused by truncations in the SNARE complex (see Figure 2C).
