# Supplementary material for: Re-examining how complexin inhibits neurotransmitter release
Source: eLife journal article supplement (doi:10.7554/elife.02391), 2014-05-08
Supplement: supp [file elife_poa_e02391_Figure_3_figure_supplement_1.pdf › elife_poa_e02391_Figure_3_figure_supplement_1.pdf]

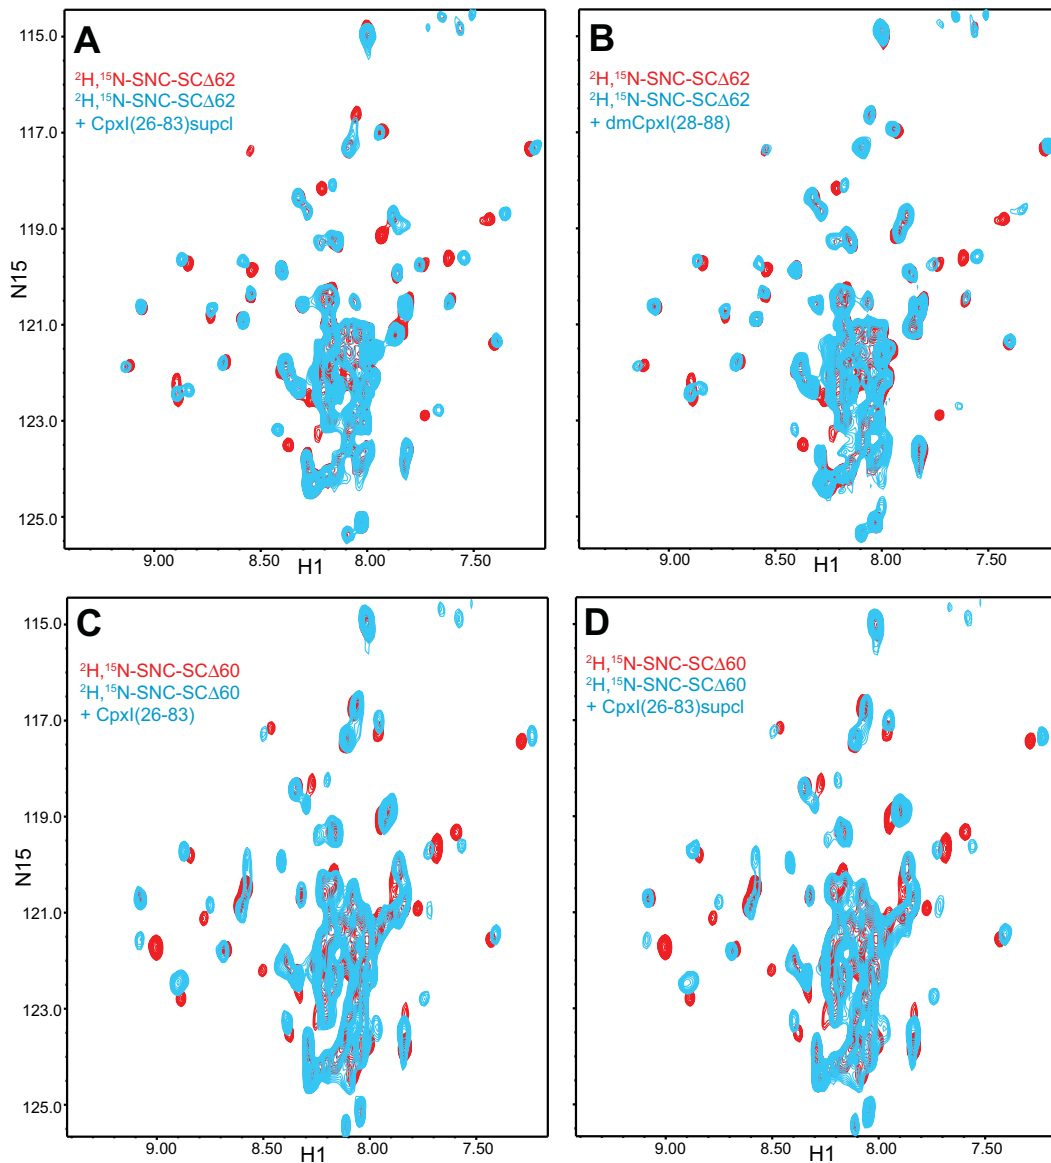

**Figure 3 – figure supplement 1. Additional NMR analyses of interactions between  $^2\text{H}, ^{15}\text{N}$ -labeled synaptobrevin-truncated SNARE complexes and CpxI fragments.**

Expansions of  $^1\text{H}$ - $^{15}\text{N}$  TROSY-HSQC spectra of  $^2\text{H}, ^{15}\text{N}$ -SNC $\Delta$ 62 (A,B) or  $^2\text{H}, ^{15}\text{N}$ -SNC $\Delta$ 60 (C,D) in the absence (red contours) or presence (blue contours) of CpxI(26-83) D27L,E34F,R37A superclamp mutant (supcl) (A,D), dmCpx(28-88) (B), or CpxI(26-83) (C).
