# Supplementary material for: Re-examining how complexin inhibits neurotransmitter release
Source: eLife journal article supplement (doi:10.7554/elife.02391), 2014-05-08
Supplement: supp [file elife_poa_e02391_Figure_4_figure_supplement_1.pdf › elife_poa_e02391_Figure_4_figure_supplement_1.pdf]

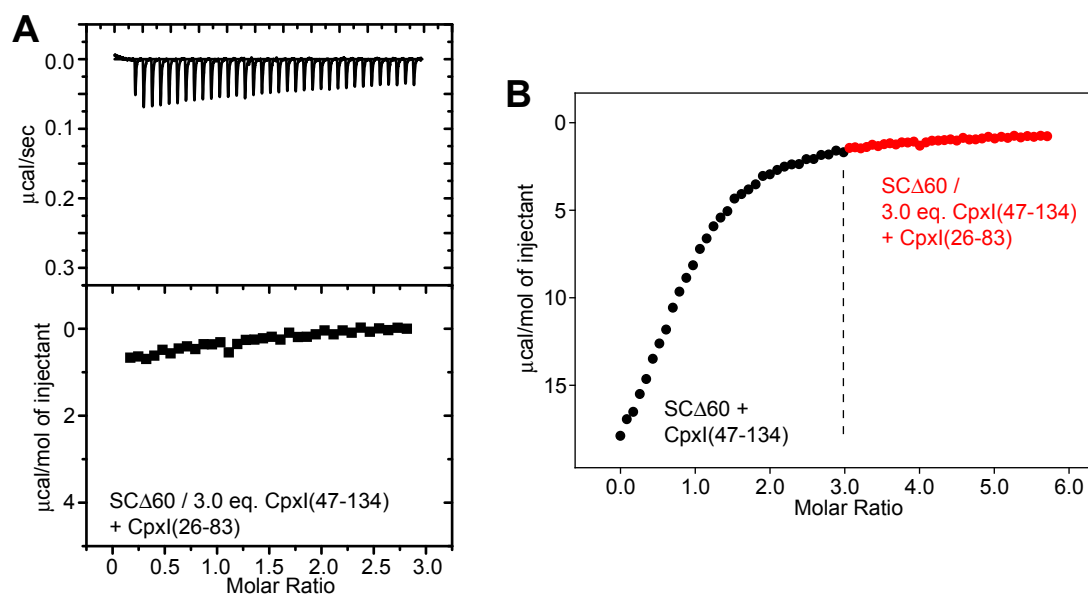

**Figure 4 – figure supplement 1. Additional ITC analysis of binding of CpxI fragments to SNARE complexes.**

**A.** Competition assay where a sample containing SC $\Delta$ 60 and 3.0 equivalents of CpxI(47-134) was titrated with WT CpxI(26-83). **B.** Composite diagram where the ITC data shown in panel A (shown here as red circles) was shifted by 3.0 molar ratio units in the x axis and plotted together with ITC data obtained in a direct titration of SC $\Delta$ 60 with CpxI(47-134), shown by black circles (analogous to that shown in Figure 4B). Note that the data in red constitute a natural continuation of the direct titration of the central helix binding site and hence there is not additional detectable heat caused by binding of the accessory helix of Cpx(26-83) to the groove within SC $\Delta$ 60.
