# Supplementary material for: Re-examining how complexin inhibits neurotransmitter release
Source: eLife journal article supplement (doi:10.7554/elife.02391), 2014-05-08
Supplement: supp [file elife_poa_e02391_Figure_5_figure_supplement_1.pdf › elife_poa_e02391_Figure_5_figure_supplement_1.pdf]

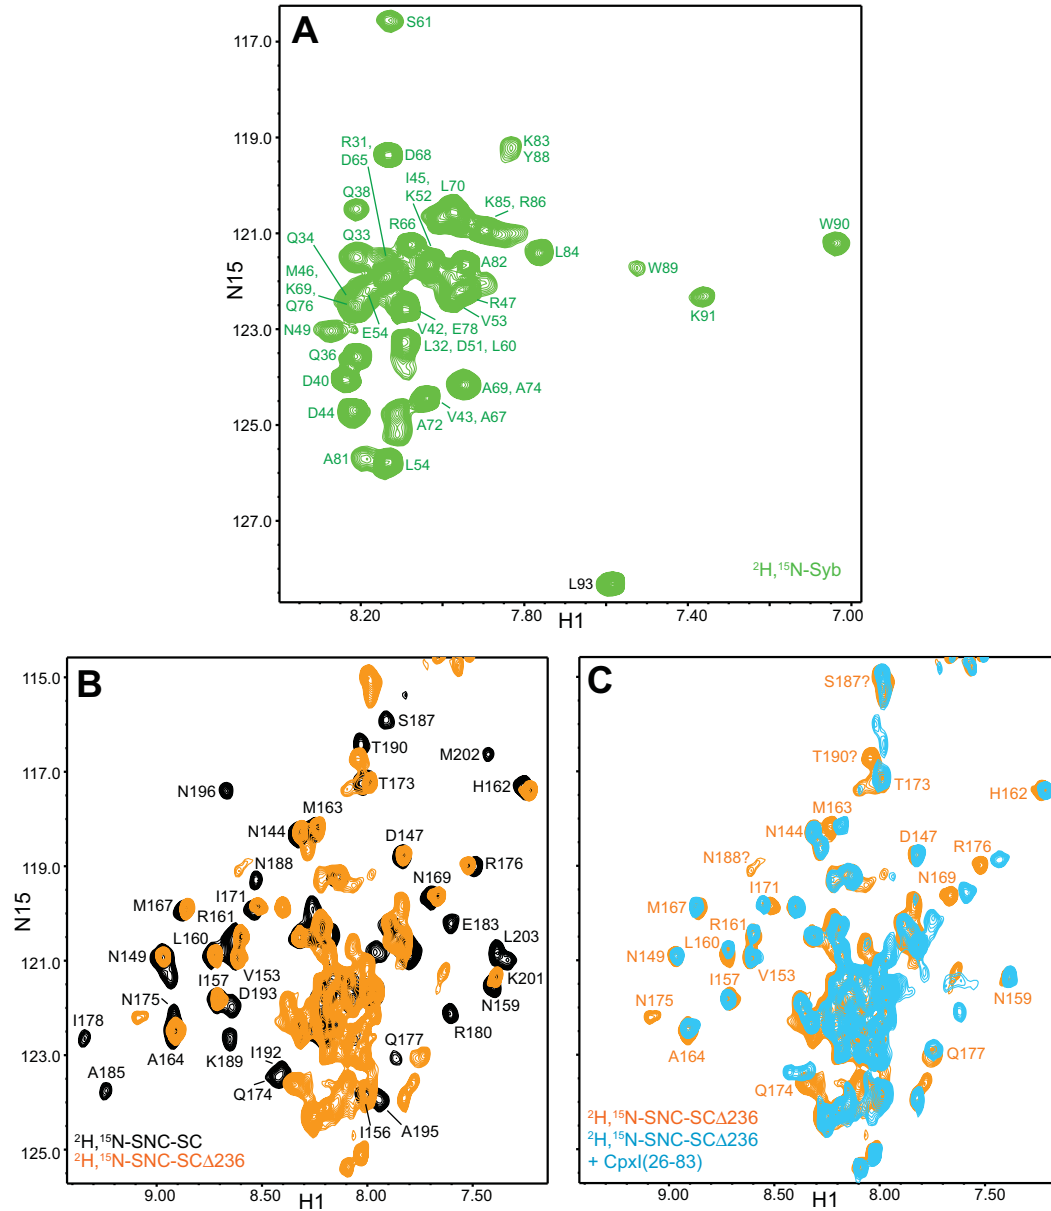

**Figure 5 – figure supplement 1. Additional NMR analyses of interactions between  $^2\text{H}$ ,  $^{15}\text{N}$ -labeled syntaxin-1 truncated SNARE complexes and CpxI fragments.**

**A.** Expansion of a  $^1\text{H}$ - $^{15}\text{N}$  TROSY-HSQC spectrum of free  $^2\text{H}$ ,  $^{15}\text{N}$ -labeled synaptobrevin SNARE motif ( $^2\text{H}$ ,  $^{15}\text{N}$ -Syb). Cross-peak assignments are based on those obtained for synaptobrevin(1-96) (Hazzard et al., 1999). **B.**  $^1\text{H}$ - $^{15}\text{N}$  TROSY-HSQC spectra of the non-truncated  $^2\text{H}$ ,  $^{15}\text{N}$ -SNC-SC (black contours) and  $^2\text{H}$ ,  $^{15}\text{N}$ -SNC-SC $\Delta$ 236 (orange contours). **C.** Expansions of  $^1\text{H}$ - $^{15}\text{N}$  TROSY-HSQC spectra of  $^2\text{H}$ ,  $^{15}\text{N}$ -SNC-SC $\Delta$ 236 in the absence (orange contours) and presence (light blue contours) of CpxI(26-83). Cross-peaks assignments for  $^2\text{H}$ ,  $^{15}\text{N}$ -Syb-SC free were described previously (Chen et al., 2005).
