# Supplementary material for: Re-examining how complexin inhibits neurotransmitter release
Source: eLife journal article supplement (doi:10.7554/elife.02391), 2014-05-08
Supplement: supp [file elife_poa_e02391_Figure_7_figure_supplement_1.pdf › elife_poa_e02391_Figure_7_figure_supplement_1.pdf]

A

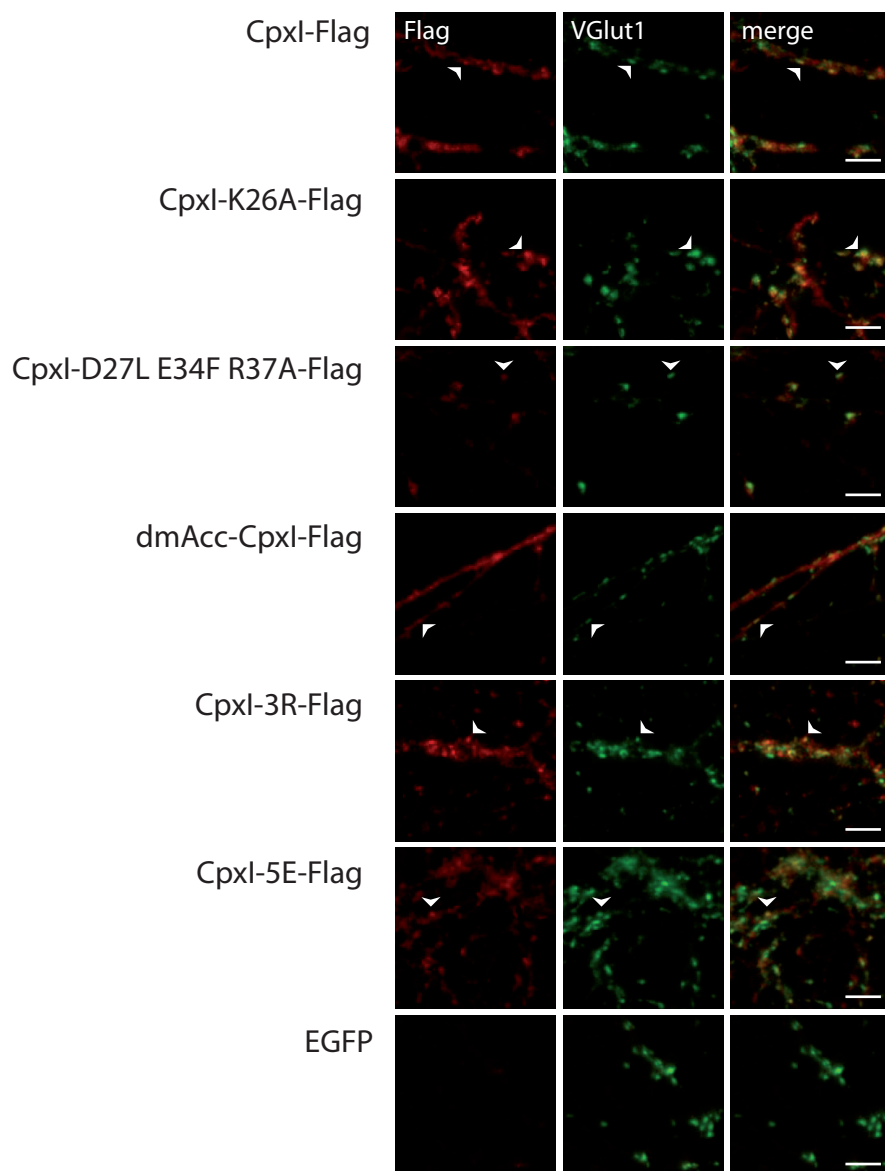

B

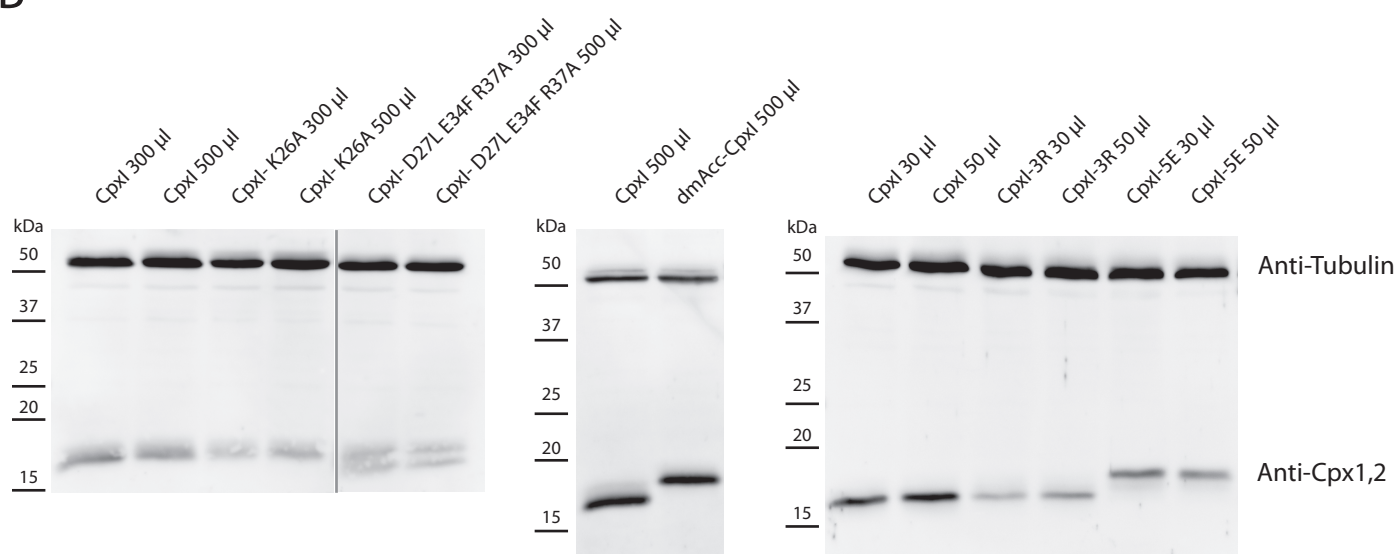

Figure 7 - figure supplement 1  
Trimbuch et al.

**Figure 7 – figure supplement 1. Expression of Cpx variants in hippocampal CPXI-III triple KO neurons by lentiviral transduction.**

**A.** Immunocytochemical detection of cytosolic complexin-FLAG tagged protein variants within presynaptic compartments illustrated by VGlut1 colocalisation. Arrowheads point towards examples of colocalisation. Scale bar: 5  $\mu$ m. **B.** Protein expression of different Cpx variants used in this study is detected by western blotting. The amounts of viruses to reach similar expression levels in individual virus preparations are indicated. TubulinIII served as loading control.
